# Supplementary material for: Plasmonic cavities derived from silver nanoparticles atop a massed silver surface for surface enhancement Raman scattering
Source: Royal Society of Chemistry journal article supplement (doi:10.1039/c4ra06977c), 2014-01-01

## Supplementary Information I

In a MIM system, there are two metal-dielectric interfaces to generate SPRs at two sides of the metallic surfaces. With electric field and magnetic field continuity relations, the dispersion relation (DR) from Maxwell's equations with a finite length of propagating TM (trans-verse magnetic) modes is

$$e^{k_i d} \left( 1 + \frac{\varepsilon_i k_m}{k_i \varepsilon_m} \right)^2 - e^{-k_i d} \left( 1 - \frac{\varepsilon_i k_m}{k_i \varepsilon_m} \right)^2 = 0 \quad k_m = \sqrt{k^2 - \frac{\omega^2}{c^2} \varepsilon_m} \quad k_i = \sqrt{k^2 - \frac{\omega^2}{c^2} \varepsilon_i}$$

where  $\varepsilon_i$  is the dielectric constant of insulator,  $\varepsilon_m$  is the dielectric constant of insulator,  $\omega$  is the frequency of surface plasmon,  $k_i$  is the wave vector in dielectric layer,  $k_m$  is the wave vector in metal layer. Considering the Drude mode of silver slabs and the energy loss from collisions (we used the constant  $\Gamma = 0.68 \times 10^{14} \text{ s}^{-1}$ ), the solution of anti-symmetrical mode is

$$\varepsilon(\omega) \left( \frac{k_i}{k_m} \right) = -\tanh \left( \frac{1}{2} k_m d \right) \quad \varepsilon(\omega) = \left( 1 - \frac{\omega_p^2}{\omega^2 + \Gamma^2} \right)$$

$$\left( 1 - \frac{\omega_p^2}{\omega^2 + \Gamma^2} \right) \left( \frac{\sqrt{k^2 - \left( \frac{\omega}{c} \right)^2}}{\sqrt{k^2 - \left( 1 - \frac{\omega_p^2}{\omega^2 + \Gamma^2} \right) \left( \frac{\omega}{c} \right)^2}} \right) = -\tanh \left( \frac{1}{2} \sqrt{k^2 - \left( 1 - \frac{\omega_p^2}{\omega^2 + \Gamma^2} \right) \left( \frac{\omega}{c} \right)^2} d \right)$$

The corresponding normalized DR curves in silver/air/silver (MIM) configurations with five types of insulator thickness are obtained by equation (1) and plotted in the Figure. The curves based on the insulator thickness from 100 nm to 1000 nm overlap completely, denoting SPPs coupling is weak as the insulator thickness larger than 100 nm. However, when the thickness decreases to 10 nm, the coupled mode happens. The normalized surface plasma frequency ( $\omega/\omega_p$ ) decreases with the decrease in the insulator thickness, especially at insulator thickness 5 nm to 2 nm, indicating the SPR wavelength is strong affected by insulator thickness.

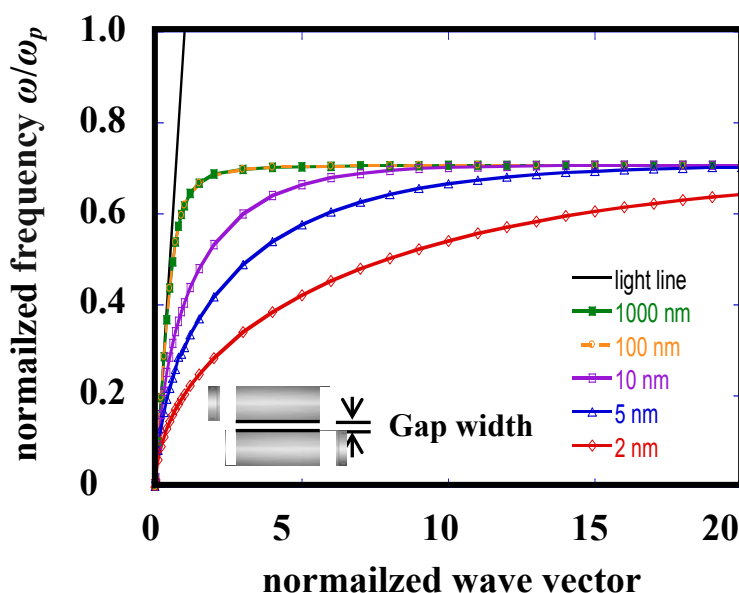

Supplement: c4ra06977c1.pdf [file c4ra06977c1.pdf]
