# Supplementary material for: Plasmonic cavities derived from silver nanoparticles atop a massed silver surface for surface enhancement Raman scattering
Source: Royal Society of Chemistry journal article supplement (doi:10.1039/c4ra06977c), 2014-01-01
Supplement: c4ra06977c2.pdf [file c4ra06977c2.pdf]

## Supplementary Information II

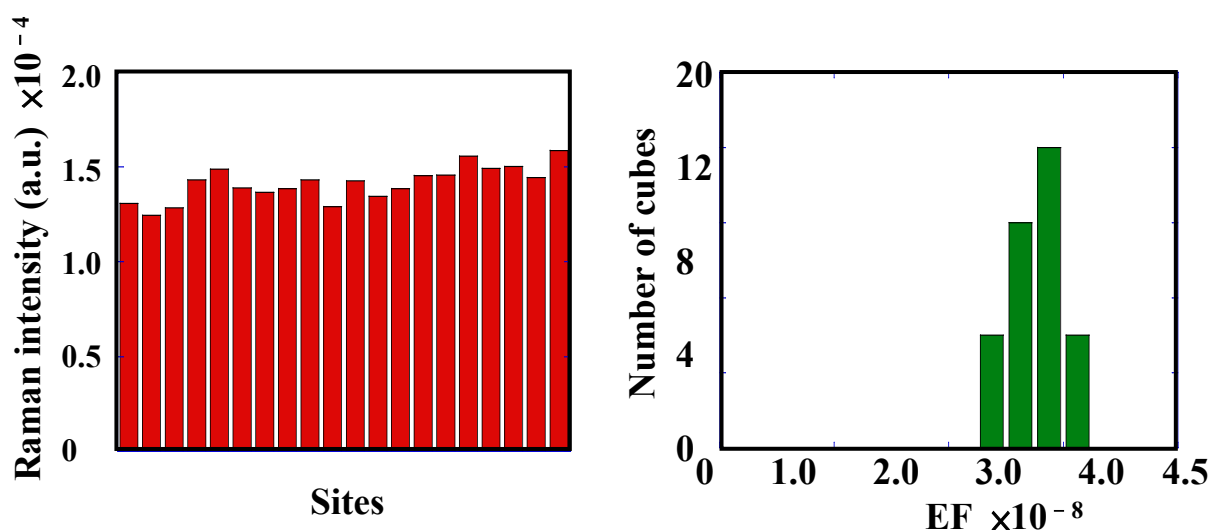

The SERS measurements were taken from 20 different sites of substrates in the presence of 633 nm laser excitation in an area of  $1 \times 2 \text{ cm}^2$ . The EFs from FDTD method are calculated according to the following equation 1<sup>32</sup>:

$$\text{Enhancement Factor}(EF) = \int \frac{EM \text{ of substrate}^4}{EM \text{ of background}^4} \dots(1)$$

The EFs from SERS measurements are calculated according to the following equation 2<sup>33</sup>:

$$\text{Analytical Enhancement Factor}(AEF) = \frac{I_{SERS}/C_{SERS}}{I_{RS}/C_{RS}} \dots(2)$$

where  $I_{SERS}$  and  $I_{RS}$  are the Raman intensity of R6G on SERS substrate and on a microscope slide, respectively.  $C_{SERS}$  and  $C_{RS}$  are the concentrations of R6G on SERS substrate and on a microscope slide, respectively.

Student-t distribution with 95 % confidence interval from peak 1360 nm was used to determine the AEF. The following equation 3 was used to calculate the 100 (1- $\alpha$ ) % confidence interval (CI).

$$\bar{X} \pm t_{\alpha/2} S / \sqrt{n} \dots\dots (3)$$

Where the  $\bar{X}$  is the mean of the samples; the value of  $t_{\alpha/2}$  is 1.729 under the condition with 19 degree of freedom and 95% CI according to the table of t distribution; n is the numbers of samples; and S is the standard deviation, that is  $1.93 \times 10^7$  for NcIM and  $1.28 \times 10^3$  for NsIM. The analytical EF of NcIM caculated is  $(3.08 \pm 0.07) \times 10^8$  while that of NsIM is  $(1.52 \pm 0.05) \times 10^3$ .
