# Supplementary material for: Plasmonic cavities derived from silver nanoparticles atop a massed silver surface for surface enhancement Raman scattering
Source: Royal Society of Chemistry journal article supplement (doi:10.1039/c4ra06977c), 2014-01-01
Supplement: c4ra06977c3.pdf [file c4ra06977c3.pdf]

### Supplementary Information III

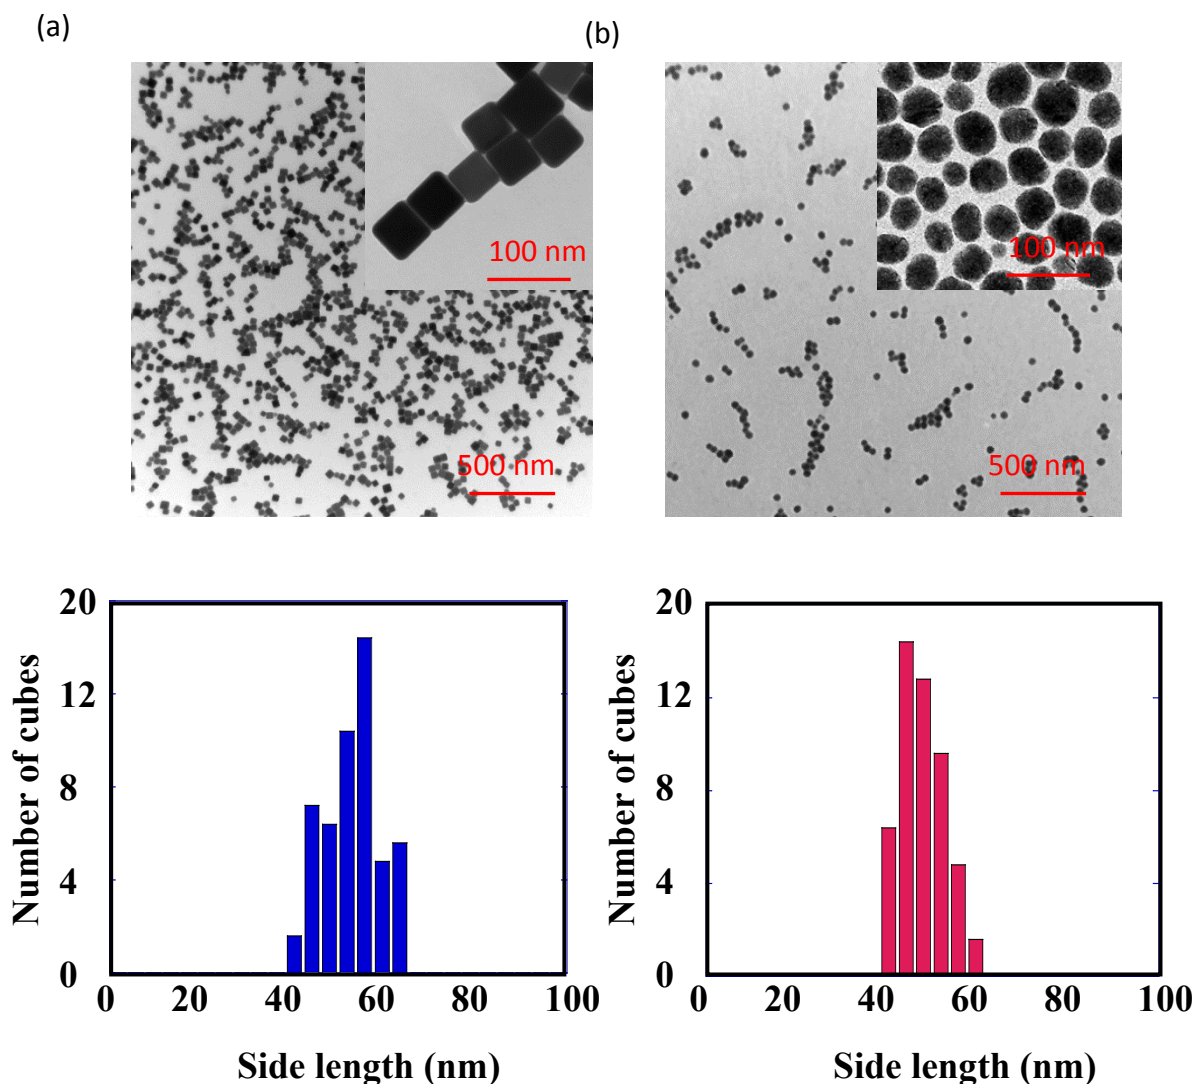

The Figure shows the tunneling electron microscope image and the size distribution of Ag nanocubes / nanospheres. Student-t distribution with 95 % confidence interval was used to determine the size of silver nanocubes and nanospheres. Again, the following equation was used to calculate the 100 (1- $\alpha$ ) % confidence interval (CI).

$$\bar{X} \pm t_{\alpha/2} S / \sqrt{n} \quad \dots\dots (3)$$

In this case, the value of  $t_{\alpha/2}$  is 1.671 under the condition with 60 degree of freedom and 95% CI according to the table of t distribution; n is the numbers of samples; and S is the standard deviation of 63 nanocubes and 65 nanospheres, that is 6.9 for nanocubes and 5.2 for nanospheres.

The average size of silver nanocubes and nanospheres are  $54.3 \pm 1.45$  and  $49.6 \pm 1.01$  nm.
